# Supplementary material for: Effects of particle size on physicochemical and functional properties of superfine black kidney bean (Phaseolus vulgaris L.) powder
Source: PeerJ. 2019 Feb 4;7:e6369. doi: 10.7717/peerj.6369 (PMC6366401; doi:10.7717/peerj.6369)
Supplement: Supplemental Information 1 — Hydration properties of BKBP with particle sizes was determined as described in the Methods section and the data is presented in Figure 2. [file peerj-07-6369-s001.xlsx]

## Sheet: Sheet1
	Hydration properties of BKBP with particle sizes of 250-180, 180–125, 125–75, 75–38 and < 38 μm for soaking time 10-60 min, (a) water holding capacity (g/g), (b) water-retention capacity (g/g).
	(a) water holding capacity (g/g)							(b) water-retention capacity (g/g).
	Time/min	250-180 μm						Time/min	250-180 μm
3 samples		sample1	sample2	sample3	mean	SD	3 samples		sample1	sample2	sample3	mean	SD
	10	5.96	5.87	6.12	5.98333	0.126623		10	0.49	0.47	0.46	0.473333	0.0152753
	20	6.03	6.07	5.99	6.03	0.04		20	0.5	0.52	0.55	0.523333	0.0251661
	30	6.12	6.17	6.26	6.18333	0.070946		30	0.55	0.57	0.56	0.56	0.01
	40	6.27	6.3	6.26	6.27667	0.0208167		40	0.6	0.62	0.6	0.606667	0.011547
	50	6.31	6.39	6.23	6.31	0.08		50	0.62	0.64	0.67	0.643333	0.0251661
	60	6.42	6.57	6.32	6.43667	0.125831		60	0.66	0.66	0.69	0.67	0.0173205
	Time/min	180-125 μm						Time/min	180-125 μm
3 samples		sample1	sample2	sample3	mean	SD	3 samples		sample1	sample2	sample3	mean	SD
	10	6.12	6.15	6.09	6.12	0.03		10	0.52	0.52	0.5	0.513333	0.011547
	20	6.21	6.29	6.31	6.27	0.052915		20	0.56	0.58	0.55	0.563333	0.0152753
	30	6.56	6.49	6.61	6.55333	0.0602771		30	0.61	0.63	0.6	0.613333	0.0152753
	40	6.81	6.77	6.89	6.82333	0.061101		40	0.63	0.66	0.63	0.64	0.0173205
	50	6.92	6.91	6.88	6.90333	0.0208167		50	0.66	0.69	0.68	0.676667	0.0152753
	60	7.02	7.17	7.13	7.10667	0.0776745		60	0.67	0.7	0.66	0.676667	0.0208167
	Time/min	125-75 μm						Time/min	125-75 μm
3 samples		sample1	sample2	sample3	mean	SD	3 samples		sample1	sample2	sample3	mean	SD
	10	6.42	6.26	6.29	6.32333	0.085049		10	0.54	0.55	0.53	0.54	0.01
	20	6.39	6.51	6.47	6.45667	0.061101		20	0.55	0.52	0.52	0.53	0.0173205
	30	6.88	6.71	6.79	6.79333	0.085049		30	0.65	0.62	0.63	0.633333	0.0152753
	40	7.29	7.1	6.77	7.05333	0.263122		40	0.68	0.69	0.66	0.676667	0.0152753
	50	7.37	7.27	7.18	7.27333	0.0950438		50	0.71	0.66	0.68	0.683333	0.0251661
	60	7.59	7.5	7.94	7.67667	0.232451		60	0.73	0.73	0.71	0.723333	0.011547
	Time/min	75-38 μm						Time/min	75-38 μm
3 samples		sample1	sample2	sample3	mean	SD	3 samples		sample1	sample2	sample3	mean	SD
	10	6.24	6.29	6.25	6.26	0.0264575		10	0.57	0.56	0.54	0.556667	0.0152753
	20	6.65	7.04	6.58	6.75667	0.247857		20	0.6	0.55	0.57	0.573333	0.0251661
	30	7.34	7.19	7.22	7.25	0.0793725		30	0.69	0.62	0.65	0.653333	0.0351188
	40	7.53	7.57	7.41	7.50333	0.0832666		40	0.67	0.69	0.67	0.676667	0.011547
	50	7.54	7.36	7.69	7.53	0.165227		50	0.71	0.69	0.69	0.696667	0.011547
	60	7.68	7.71	7.89	7.76	0.113578		60	0.7	0.72	0.69	0.703333	0.0152753
	Time/min	< 38 μm						Time/min	< 38 μm
3 samples		sample1	sample2	sample3	mean	SD	3 samples		sample1	sample2	sample3	mean	SD
	10	6.27	6.16	6.36	6.26333	0.100167		10	0.49	0.53	0.56	0.526667	0.0351188
	20	6.79	6.99	6.84	6.87333	0.104083		20	0.55	0.56	0.58	0.563333	0.0152753
	30	7.36	7.38	7.49	7.41	0.07		30	0.68	0.65	0.64	0.656667	0.0208167
	40	7.88	7.69	8.02	7.86333	0.16563		40	0.74	0.71	0.7	0.716667	0.0208167
	50	7.79	7.72	7.91	7.80667	0.0960902		50	0.74	0.72	0.7	0.72	0.02
	60	8	8.16	7.94	8.03333	0.113725		60	0.72	0.73	0.76	0.736667	0.0208167
