# Supplementary material for: Effects of particle size on physicochemical and functional properties of superfine black kidney bean (Phaseolus vulgaris L.) powder
Source: PeerJ. 2019 Feb 4;7:e6369. doi: 10.7717/peerj.6369 (PMC6366401; doi:10.7717/peerj.6369)
Supplement: Supplemental Information 2 — DSC curves of BKBP were determined as described in the Methods section and final data is presented in Figure 3. [file peerj-07-6369-s002.xlsx]

## Sheet: Sheet1
DSC curves of BKBP with particle sizes of 250-180, 180–125, 125–75, 75–38 and < 38 μm, recoded from 20 to 220 ℃ at a heating rate of 10 ℃/min.
Temperature	Heat Flow	Temperature	Heat Flow	Temperature	Heat Flow	Temperature	Heat Flow	Temperature	Heat Flow
℃	W/g	℃	W/g	℃	W/g	℃	W/g	℃	W/g
	250-180 um		180-125 um		125-75 um		75-38 um		< 38 um
31.7516	-0.75929	30.3506	-0.81896	30.5304	-0.71552	30.9309	-0.47531	32.2499	-0.15749
32.0569	-0.83177	30.6122	-0.87482	31.0101	-0.76324	31.8913	-0.49729	32.7742	-0.2058
32.4058	-0.90788	30.8303	-0.92237	31.8824	-0.79224	34.2467	-0.52603	33.5602	-0.25531
32.8419	-0.98218	31.0483	-0.97521	34.0632	-0.80432	37.4739	-0.54421	34.6512	-0.29457
33.3217	-1.0601	31.3972	-1.03333	37.5087	-0.817	40.8756	-0.55265	36.5706	-0.32597
33.8887	-1.1498	31.7896	-1.10127	40.5181	-0.82848	44.1464	-0.56068	39.6672	-0.34771
34.5429	-1.21867	32.3565	-1.17373	43.5712	-0.83754	47.1991	-0.56997	42.5019	-0.35797
35.9822	-1.31924	33.3595	-1.24167	47.2784	-0.84419	50.6442	-0.57927	45.293	-0.37005
38.0321	-1.39988	34.6677	-1.293	50.5059	-0.84902	53.6096	-0.58687	48.8692	-0.38575
40.1692	-1.45062	36.7609	-1.32998	53.2973	-0.85023	56.008	-0.59236	51.6167	-0.39722
43.6584	-1.50408	39.6389	-1.35187	56.4375	-0.85506	59.4531	-0.59743	55.1491	-0.4087
46.7987	-1.54847	42.6914	-1.37376	59.9267	-0.85808	62.9853	-0.60292	57.9836	-0.4087
49.8081	-1.58925	46.8341	-1.38961	63.1106	-0.8617	65.9507	-0.61052	60.4254	-0.39843
52.8175	-1.63002	50.846	-1.40245	66.4253	-0.86593	69.2649	-0.61601	62.1696	-0.39783
55.9142	-1.66264	54.509	-1.41377	69.4784	-0.86956	73.1024	-0.62404	65.5274	-0.39843
59.2725	-1.69073	57.9103	-1.42132	72.9676	-0.87318	75.1957	-0.63079	68.798	-0.40085
63.2415	-1.71882	61.5733	-1.43264	76.3695	-0.87922	79.0332	-0.63628	72.2866	-0.40326
66.5998	-1.74509	65.5416	-1.4417	79.7278	-0.88345	82.5655	-0.64346	77.2145	-0.41413
69.9581	-1.7759	68.1144	-1.44849	83.566	-0.88828	86.1414	-0.64853	80.9647	-0.41715
72.8367	-1.80489	72.2135	-1.46132	87.0115	-0.89493	89.9353	-0.65486	84.6278	-0.41896
75.8025	-1.83932	75.5276	-1.47566	90.6752	-0.89855	92.6391	-0.66078	88.291	-0.42802
79.597	-1.88825	79.3651	-1.49076	94.3388	-0.90459	96.1714	-0.66753	92.0849	-0.43345
82.9989	-1.93265	82.6792	-1.50737	97.9588	-0.91003	99.9217	-0.67387	96.2713	-0.43829
86.3573	-1.97976	85.7317	-1.52473	102.32	-0.91607	104.239	-0.68147	100.501	-0.44493
89.672	-2.0296	89.0895	-1.54586	105.722	-0.91848	105.94	-0.68907	104.121	-0.45097
92.7687	-2.07309	92.5781	-1.57153	108.557	-0.92211	109.036	-0.6971	107.566	-0.457
95.8653	-2.11024	96.1102	-1.5987	111.305	-0.92815	112.481	-0.70217	111.098	-0.46063
98.3514	-2.13923	98.9011	-1.62135	114.576	-0.93359	115.839	-0.70935	114.892	-0.46727
101.23	-2.16641	102.608	-1.65607	117.716	-0.94204	119.197	-0.71737	117.552	-0.46908
105.373	-2.18907	106.445	-1.69909	120.987	-0.9505	122.424	-0.72624	122	-0.47452
108.121	-2.19903	109.062	-1.73533	123.517	-0.95895	125.215	-0.73596	124.66	-0.47935
111.305	-2.21625	111.809	-1.77835	125.96	-0.98372	127.788	-0.74906	129.021	-0.48478
113.965	-2.25249	113.815	-1.81307	127.573	-1.00788	130.405	-0.75836	132.554	-0.49143
115.885	-2.2987	115.995	-1.85534	130.016	-1.03748	133.284	-0.78034	136.391	-0.50229
117.585	-2.35307	118.524	-1.91724	132.24	-1.07372	135.422	-0.80739	140.447	-0.51558
118.676	-2.41015	119.963	-1.95574	133.941	-1.10997	137.254	-0.83444	143.413	-0.52886
119.766	-2.48263	121.926	-2.0131	135.38	-1.15044	138.04	-0.86106	146.335	-0.54336
120.769	-2.54696	123.67	-2.06066	136.427	-1.1891	138.651	-0.88558	149.475	-0.55966
121.642	-2.6122	125.545	-2.10519	137.43	-1.2187	139.088	-0.91432	152.702	-0.58019
122.819	-2.69284	127.159	-2.1369	138.608	-1.25735	139.655	-0.9494	155.275	-0.60133
123.648	-2.75083	129.339	-2.16181	139.567	-1.28937	140.267	-0.98449	157.936	-0.62548
124.913	-2.81063	131.04	-2.16407	140.57	-1.32984	140.704	-1.01872	161.076	-0.65568
126.439	-2.85684	133.656	-2.1535	141.399	-1.37877	141.315	-1.06099	163.563	-0.68708
128.009	-2.86862	135.793	-2.12104	141.879	-1.42468	141.883	-1.09143	165.569	-0.71365
129.405	-2.85956	138.584	-2.07198	142.49	-1.46213	142.233	-1.12989	168.099	-0.74686
130.495	-2.8215	140.502	-2.03726	143.187	-1.51045	142.757	-1.16709	169.539	-0.76618
132.109	-2.75627	143.032	-1.99272	143.58	-1.55153	143.063	-1.19076	171.894	-0.79638
133.374	-2.69103	145.474	-1.95272	144.016	-1.5926	143.413	-1.21993	173.813	-0.81751
134.813	-2.61583	148.134	-1.91422	144.409	-1.64334	143.937	-1.24909	174.817	-0.8465
136.122	-2.54153	151.012	-1.87648	145.019	-1.69348	144.375	-1.27995	175.559	-0.87246
137.474	-2.46814	154.064	-1.841	145.586	-1.73878	144.899	-1.30827	176.693	-0.89903
138.826	-2.39565	157.335	-1.80402	146.066	-1.77563	145.336	-1.34082	178.045	-0.90628
140.483	-2.32135	160.78	-1.76929	146.546	-1.81851	146.427	-1.36702	179.745	-0.8942
141.923	-2.26065	163.876	-1.74438	147.549	-1.83966	147.387	-1.39915	181.358	-0.86341
143.842	-2.18816	167.234	-1.71721	148.378	-1.84328	148.172	-1.42747	183.102	-0.82114
145.63	-2.13017	170.548	-1.69457	149.512	-1.83664	149.044	-1.45156	185.019	-0.77645
147.854	-2.07037	172.641	-1.68173	151.3	-1.80281	150.133	-1.46128	186.763	-0.73539
149.773	-2.01873	175.65	-1.66664	152.913	-1.75509	151.353	-1.45028	188.594	-0.70278
152.346	-1.96527	179.226	-1.64928	154.047	-1.70737	152.311	-1.42534	190.904	-0.66171
155.051	-1.91453	182.496	-1.63569	155.181	-1.6675	153.27	-1.39533	193.345	-0.62729
158.06	-1.86741	185.985	-1.62663	156.621	-1.6228	154.141	-1.35855	195.525	-0.60133
160.982	-1.83298	190.215	-1.61531	157.449	-1.57085	155.361	-1.33234	198.097	-0.57597
164.559	-1.79674	194.488	-1.60927	158.714	-1.52132	156.537	-1.29514	201.498	-0.5506
168.44	-1.76231	198.238	-1.60927	159.892	-1.48387	157.67	-1.26344	204.768	-0.53068
170.185	-1.7469	201.509	-1.60776	161.157	-1.43615	158.803	-1.2292	207.864	-0.51498
175.68	-1.71972	206.088	-1.60927	162.421	-1.39629	159.936	-1.19749	211.003	-0.50229
179.126	-1.70794	209.14	-1.60625	163.468	-1.35461	161.112	-1.17551	214.099	-0.49324
182.746	-1.69888	212.803	-1.59493	165.038	-1.31413	162.899	-1.14211	217.587	-0.48056
186.453	-1.69073	215.812	-1.58436	166.957	-1.26702	165.646	-1.10745
190.466	-1.68982	219.17	-1.56171	168.876	-1.24527	167.171	-1.07532
196.659	-1.69435			171.144	-1.2187	168.959	-1.04446
200.846	-1.70341			173.631	-1.18487	171.662	-1.0174
202.765	-1.70523			176.16	-1.16252	174.714	-0.99076
206.124	-1.71066			179.3	-1.14681	177.591	-0.96836
209.046	-1.71157			182.397	-1.12567	181.341	-0.94806
212.36	-1.70976			186.104	-1.10755	184.698	-0.93072
216.068	-1.70069			189.768	-1.09305	188.405	-0.91635
219.731	-1.67986			193.214	-1.07614	192.634	-0.90366
				196.615	-1.06164	195.948	-0.89013
				200.017	-1.05379	199.262	-0.87744
				203.027	-1.04352	202.576	-0.86349
				206.211	-1.03144	206.326	-0.85038
				209.744	-1.01936	209.771	-0.83219
				212.36	-1.00184	212.954	-0.81739
				215.283	-0.98976	215.003	-0.79752
				219.426	-0.97466	217.881	-0.77173
