# Supplementary material for: Effects of particle size on physicochemical and functional properties of superfine black kidney bean (Phaseolus vulgaris L.) powder
Source: PeerJ. 2019 Feb 4;7:e6369. doi: 10.7717/peerj.6369 (PMC6366401; doi:10.7717/peerj.6369)
Supplement: Supplemental Information 3 — Cholesterol adsorption capacity and adsorption isotherms analysis were determined as described in the Methods section. Data is shown in Figure 4 and Table 3. [file peerj-07-6369-s003.xlsx]

## Sheet: Sheet1
	Cholesterol adsorption capacity of BKBP for different particle size (a), powder dosage (b), initial cholesterol concentration (c), absorption time (d) and temperature (e).
a	Powder particles	Adsorption capacity
	(μm)	mg/g
3 samples		sample 1	sample 2	sample 3	mean	SD
	250-180	19.55	18.72	19.39	19.22	0.440341
	180-125	22.07	22.63	22.59	22.43	0.31241
	125-75	24.16	22.74	24.08	23.66	0.797747
	75-38	25.92	25.96	26.37	26.0833	0.249065
	< 38	26.91	27.02	27.87	27.2667	0.525389
b	Powder dosage	Adsorption capacity
	（g）	mg/g
3 samples		sample 1	sample 2	sample 3	mean	SD
	0.1	26.91	27.07	26.88	26.9533	0.09582
	0.2	21.02	20.59	23.46	21.69	1.44798
	0.3	19.19	21.3	17.78	19.4233	1.76129
	0.4	17.55	17.62	18.19	17.7867	0.293074
	0.5	16.29	15.99	15.73	16.0033	0.154104
	0.6	15.28	15.25	16.01	15.5133	0.385924
c	Initial cholesterol concentration	Adsorption capacity
	mg/ml	mg/g
3 samples		sample 1	sample 2	sample 3	mean	SD
	0.25	2.02	2.75	2.73	2.5	0.415812
	0.5	7.75	7.28	7.06	7.36333	0.352467
	0.75	15.63	18.85	17.28	17.2533	1.61017
	1	26.91	25.5	25.92	26.11	0.723948
	1.25	32.22	29.08	31.6	30.9667	1.66305
	1.5	31.87	32.04	31.69	31.8667	0.175024
d	Temperature ℃	Adsorption capacity
		mg/g
3 samples		sample 1	sample 2	sample 3	mean	SD
	18	29.68	30.02	28.87	29.5233	0.59079
	25	26.91	28.04	26.88	27.2767	0.661236
	37	22.93	23.59	22.06	22.86	0.767398
	45	18.88	17.94	17.6	18.14	0.663023
	50	15.56	12.91	16.52	14.9967	1.86977
	55	12.87	13.09	12.45	12.8033	0.325167
	60	10.87	12.09	10.73	11.23	0.748064
e	Time	Adsorption capacity
3 samples	min	mg/g
		sample 1	sample 2	sample 3	mean	SD
	10	10.2	9.87	10.26	10.11	0.21
	20	18.55	19.04	18.7	18.7633	0.251064
	30	22.84	24.46	22.95	23.4167	0.905226
	60	25.79	26.8	24.39	25.66	1.21025
	90	26.91	26.88	27.32	27.0367	0.245832
	120	27.06	26.49	27.96	27.17	0.741148
	150	27.23	28.14	26.83	27.4	0.671342
	Fitted isothermal adsorption models and their parameters, (a) Langmuir isotherm; (b) Freundlich isotherm
a
Langmuir isotherm	1/Ce	1/qe
	1.21862	0.03716
	1.3894	0.04757
	1.62285	0.05211
	1.8797	0.05698
	2.18818	0.06139
	2.57202	0.06545
b
Freundlich isotherm	Ce	qe	lg Ce	lg qe
	0.8206	26.91	-0.0858685	1.42991
	0.71973	21.02	-0.14283	1.32263
	0.6162	19.19	-0.210278	1.28307
	0.532	17.55	-0.274088	1.24428
	0.457	16.29	-0.340084	1.21192
	0.3888	15.28	-0.410274	1.18412
	Separation factor RL for the Langmuir isotherm
	C0 (mg/mL)	RL
	0.25	0.804
	0.5	0.672
	0.75	0.578
	1	0.506
	1.25	0.451
	1.5	0.415
	1.75	0.37
